# Supplementary material for: Effects of Oat Hay Content in Diets on Nutrient Metabolism and the Rumen Microflora in Sheep
Source: Animals (Basel). 2020 Dec 9;10(12):2341. doi: 10.3390/ani10122341 (PMC7763615; doi:10.3390/ani10122341)
Supplement: Supplementary file 1 [file animals-10-02341-s001.xlsx]

## Sheet: Sheet1
Sample ID	PE Reads	Raw Tags	Clean Tags	Effective Tags	AvgLen(bp)	GC(%)	Q20(%)	Q30(%)	Effective(%)
C01	18446	2284	2258	2233	420	52.53	98.34	92.09	12.11
C02	15552	1703	1678	1659	422	53.16	98.38	92.04	10.67
C03	17032	1938	1919	1908	420	52.77	98.23	91.55	11.2
C04	22676	1961	1931	1919	419	53.1	98.38	92.13	8.46
C05	31717	3147	3106	3059	420	52.85	98.34	92	9.64
C11	18206	2377	2356	2335	420	52.72	98.43	92.25	12.83
C12	14703	1446	1419	1407	420	53.09	98.25	91.53	9.57
C13	18806	2211	2185	2146	419	52.72	98.42	92.2	11.41
C14	28895	2324	2283	2264	419	53.08	98.38	92.12	7.84
C15	34044	3488	3438	3399	421	52.94	98.47	92.38	9.98
C31	13156	1200	1182	1170	418	52.5	97.97	90.37	8.89
C32	17645	1750	1728	1724	421	53.15	98.36	91.96	9.77
C33	10469	1225	1213	1207	420	52.62	98.25	91.51	11.53
C34	30137	3104	3067	3044	419	52.82	98.41	92.18	10.1
C35	32546	1842	1803	1786	420	52.74	98.31	91.98	5.49
C51	14505	1623	1598	1580	419	53.15	98.46	92.39	10.89
C52	12978	1521	1507	1492	422	52.68	98.33	91.99	11.5
C53	12791	1392	1379	1367	420	52.43	98.32	91.88	10.69
C54	38574	4035	3994	3969	419	52.73	98.29	91.68	10.29
C55	27035	2348	2302	2291	420	52.72	98.18	91.29	8.47
C71	14884	1616	1596	1581	419	53.32	98.34	91.9	10.62
C72	13944	1423	1403	1389	420	52.95	98.44	92.36	9.96
C73	14437	1001	988	978	419	52.41	98.1	90.98	6.77
C74	16047	1977	1956	1941	420	52.47	98.37	92.01	12.1
C75	27728	2607	2565	2548	421	52.58	98.34	91.95	9.19
M01	15876	1627	1607	1583	418	53.09	98.49	92.5	9.97
M02	17024	2028	1999	1986	419	53.39	98.48	92.39	11.67
M03	17758	1996	1969	1957	418	53.07	98.52	92.5	11.02
M04	18310	2005	1978	1959	420	52.82	98.44	92.3	10.7
M05	16445	2077	2056	2040	420	53.58	98.45	92.21	12.4
M11	20470	2551	2523	2504	419	53.18	98.42	92.18	12.23
M12	21842	2534	2494	2477	420	53.44	98.43	92.2	11.34
M13	13554	1906	1879	1862	419	53.14	98.45	92.4	13.74
M14	13257	1240	1227	1221	420	52.75	98.45	92.24	9.21
M15	12313	1289	1276	1263	419	53.67	98.48	92.39	10.26
M31	13979	1921	1915	1911	419	53.54	98.44	92.32	13.67
M32	15556	1784	1771	1766	420	53.29	98.44	92.33	11.35
M33	16584	1833	1818	1805	418	52.83	98.46	92.3	10.88
M34	18804	1930	1901	1896	420	52.67	98.44	92.25	10.08
M35	15778	1570	1554	1537	418	53.51	98.33	91.85	9.74
M51	18021	2507	2488	2470	418	52.68	98.52	92.62	13.71
M52	17780	1748	1725	1722	420	52.97	98.41	92.23	9.69
M53	20952	1802	1777	1764	417	52.75	98.51	92.58	8.42
M54	14247	1209	1185	1179	419	52.63	98.01	90.68	8.28
M55	2785	296	294	291	415	53.33	98.56	92.8	10.45
M71	29775	2702	2661	2635	419	52.46	98.34	91.97	8.85
M72	25399	2429	2403	2393	420	52.84	98.31	91.91	9.42
M73	30885	3287	3250	3230	417	52.56	98.47	92.36	10.46
M74	19887	2182	2149	2134	420	52.73	98.41	92.21	10.73
M75	19920	2550	2516	2497	420	53.35	98.45	92.33	12.54
O01	25096	1937	1912	1898	419	52.28	98.27	91.75	7.56
O02	24115	2582	2549	2538	420	53.14	98.42	92.19	10.52
O03	29951	2827	2789	2770	420	53.32	98.34	92.04	9.25
O04	21889	2289	2250	2232	419	53.07	98.39	92.12	10.2
O05	17531	2085	2055	2043	416	52.59	98.41	92.13	11.65
O11	21725	1415	1390	1382	419	52.37	97.63	89.24	6.36
O12	29981	2998	2962	2943	421	53.21	98.42	92.3	9.82
O13	30084	2280	2236	2218	419	53.07	98.35	92.02	7.37
O14	14230	1550	1529	1516	419	53.01	98.45	92.26	10.65
O31	32174	2841	2804	2784	420	52.66	98.45	92.4	8.65
O32	32305	2113	2070	2055	420	52.97	98.24	91.58	6.36
O33	35158	3456	3404	3379	419	53.01	98.47	92.39	9.61
O34	17373	1940	1920	1898	420	52.82	98.36	91.91	10.92
O35	17428	2330	2303	2289	419	52.89	98.46	92.4	13.13
O51	24189	2685	2664	2649	419	52.34	98.19	91.24	10.95
O52	23760	2039	2000	1991	420	53.13	98.2	91.36	8.38
O53	30617	3265	3219	3201	420	53.23	98.21	91.4	10.45
O54	22497	2307	2283	2278	420	52.83	98.45	92.28	10.13
O55	30592	2772	2728	2719	419	52.7	98.42	92.24	8.89
O71	32195	3371	3333	3315	420	52.45	98.23	91.45	10.3
O72	32668	3684	3631	3613	420	52.86	98.22	91.33	11.06
O73	31508	3480	3424	3406	420	53.01	98.3	91.81	10.81
O74	28663	1760	1726	1716	420	52.46	98.33	92.14	5.99
O75	24089	2256	2235	2226	419	52.41	98.32	91.79	9.24
